# Supplementary material
Source: HighWire-hosted journal article supplement (https://bmjopen.bmj.com/content/10/1/e029172)
Supplement: inline-supplementary-material-1 [file inline-supplementary-material-1.pdf]

## Supplemental material

eTable 1 – Assessment of the quality of the evidence using appraisal tool for cross-sectional studies (AXIS tool).

| <b>Name</b>                                                                                      | <b>Kristensen et al. 2018</b> | <b>Renom-Guiteras et al. 2018</b> | <b>Oesterhus et al. 2017</b> | <b>Sönnerstam et al. 2017</b> | <b>Barry et al. 2016</b> | <b>Cross et al. 2016</b> | <b>Hanlon et al. 2015</b> | <b>Skoldunger et al. 2015</b> | <b>Tija et al. 2014</b> | <b>Bosboom et al. 2012</b> | <b>Montrastruc et al. 2012</b> | <b>Parsons et al. 2012</b> |
|--------------------------------------------------------------------------------------------------|-------------------------------|-----------------------------------|------------------------------|-------------------------------|--------------------------|--------------------------|---------------------------|-------------------------------|-------------------------|----------------------------|--------------------------------|----------------------------|
| Introduction                                                                                     |                               |                                   |                              |                               |                          |                          |                           |                               |                         |                            |                                |                            |
| 1 Were the aims/objectives of the study clear?                                                   | YES                           | YES                               | YES                          | YES                           | YES                      | YES                      | YES                       | YES                           | YES                     | YES                        | YES                            | YES                        |
| Methods                                                                                          |                               |                                   |                              |                               |                          |                          |                           |                               |                         |                            |                                |                            |
| 2 Was the study design appropriate for the stated aim(s)?                                        | YES                           | YES                               | YES                          | YES                           | YES                      | YES                      | YES                       | YES                           | YES                     | YES                        | YES                            | YES                        |
| 3 Was the sample size justified?                                                                 | NO                            | NO                                | NO                           | NO                            | NO                       | NO                       | NO                        | NO                            | NO                      | NO                         | NO                             | NO                         |
| 4 Was the target/reference population clearly defined? (Is it clear who the research was about?) | YES                           | YES                               | YES                          | YES                           | YES                      | YES                      | YES                       | YES                           | YES                     | YES                        | YES                            | YES                        |

|                                                                                                                                                      |     |     |     |     |     |     |     |     |     |     |     |     |
|------------------------------------------------------------------------------------------------------------------------------------------------------|-----|-----|-----|-----|-----|-----|-----|-----|-----|-----|-----|-----|
| 5 Was the sample frame taken from an appropriate population base so that it closely represented the target/reference population under investigation? | YES | YES | YES | YES | YES | YES | NO  | YES | YES | YES | YES | NO  |
| 6 Was the selection process likely to select subjects/participants that were representative of the target/reference population under investigation?  | YES | YES | YES | YES | YES | YES | YES | YES | YES | YES | YES | YES |
| 7 Were measures undertaken to address and categorise non-responders?                                                                                 | NO  | NO  | NO  | YES | NO  | NO  | YES | NO  | NO  | YES | NO  | NO  |

|                                                                                                                                                         |     |     |     |     |     |     |     |     |     |     |     |     |
|---------------------------------------------------------------------------------------------------------------------------------------------------------|-----|-----|-----|-----|-----|-----|-----|-----|-----|-----|-----|-----|
| 8 Were the risk factor and outcome variables measured appropriate to the aims of the study?                                                             | YES | YES | YES | YES | YES | YES | YES | YES | YES | YES | YES | YES |
| 9 Were the risk factor and outcome variables measured correctly using instruments/measurements that had been trialled, piloted or published previously? | YES | YES | YES | NO  | NO  | YES | YES | YES | YES | YES | YES | NO  |
| 10 Is it clear what was used to determine statistical significance and/or precision estimates? (eg, p values, CIs)                                      | YES | YES | YES | YES | YES | YES | YES | YES | YES | YES | YES | YES |

|                                                                                                           |     |     |     |     |     |     |     |     |     |     |     |     |
|-----------------------------------------------------------------------------------------------------------|-----|-----|-----|-----|-----|-----|-----|-----|-----|-----|-----|-----|
| 11 Were the methods (including statistical methods) sufficiently described to enable them to be repeated? | YES | YES | YES | YES | YES | YES | NO  | YES | YES | YES | YES | YES |
| Results                                                                                                   |     |     |     |     |     |     |     |     |     |     |     |     |
| 12 Were the basic data adequately described?                                                              | YES | YES | YES | YES | YES | YES | YES | YES | YES | YES | YES | YES |
| 13 Does the response rate raise concerns about non-response bias?                                         | NO  | NO  | NO  | NO  | NO  | YES | NO  | YES | NO  | YES | YES | YES |
| 14 If appropriate, was information about non-responders described?                                        | N/A | NO  | NO  | YES | N/A | NO  | N/A | YES | N/A | NO  | NO  | YES |
| 15 Were the results internally consistent?                                                                | YES | YES | YES | YES | YES | YES | YES | YES | YES | YES | YES | YES |

|                                                                                                                        |     |     |     |     |     |     |     |     |     |     |     |     |
|------------------------------------------------------------------------------------------------------------------------|-----|-----|-----|-----|-----|-----|-----|-----|-----|-----|-----|-----|
| 16 Were the results for the analyses described in the methods, presented?                                              | YES | YES | YES | YES | YES | YES | YES | YES | YES | YES | YES | YES |
| Discussion                                                                                                             |     |     |     |     |     |     |     |     |     |     |     |     |
| 17 Were the authors' discussions and conclusions justified by the results?                                             | YES | YES | YES | YES | YES | YES | YES | YES | YES | YES | YES | YES |
| 18 Were the limitations of the study discussed?                                                                        | YES | YES | YES | YES | YES | YES | YES | YES | YES | NO  | YES | YES |
| Other                                                                                                                  |     |     |     |     |     |     |     |     |     |     |     |     |
| 19 Were there any funding sources or conflicts of interest that may affect the authors' interpretation of the results? | NO  | NO  | NO  | NO  | NO  | NO  | NO  | NO  | NO  | YES | NO  | YES |
| 20 Was ethical approval or consent of                                                                                  | NO  | YES | YES | YES | YES | YES | YES | YES | YES | YES | YES | YES |

|                           |  |  |  |  |  |  |  |  |  |  |  |  |
|---------------------------|--|--|--|--|--|--|--|--|--|--|--|--|
| participants<br>attained? |  |  |  |  |  |  |  |  |  |  |  |  |
|---------------------------|--|--|--|--|--|--|--|--|--|--|--|--|
